# Supplementary material for: Evaluation of Agricultural BMPs’ Impact on Water Quality and Crop Production Using SWAT+ Model
Source: MDPI journal article supplement (doi:10.3390/agriculture13081484), 2023-07-26
Supplement: s1 [file s1]

**Table S1.** Spatial and temporal input datasets used in the study.

| Data Type                     | Description                                                                                                                                                                                       |
|-------------------------------|---------------------------------------------------------------------------------------------------------------------------------------------------------------------------------------------------|
| Digital Elevation Model (DEM) | Source: USGS National Map<br>( <a href="https://apps.nationalmap.gov/viewer/">https://apps.nationalmap.gov/viewer/</a> )<br>Resolution: 10 m                                                      |
| Land Use/Land Cover           | Source: National Land Cover Database (NLCD)<br>( <a href="https://www.mrlc.gov/data">https://www.mrlc.gov/data</a> )<br>Resolution: 10 m                                                          |
| Soil                          | Source: NRCS Web Soil Survey<br>( <a href="https://websoilsurvey.sc.egov.usda.gov/App/WebSoilSurvey.aspx">https://websoilsurvey.sc.egov.usda.gov/App/WebSoilSurvey.aspx</a> )<br>Resolution: 10 m |
| Crop Information              | Source: USDA NASS<br>Resolution: 30 m                                                                                                                                                             |
| Climate                       | Source: gridMet<br>( <a href="http://www.climatologylab.org/gridmet.html">http://www.climatologylab.org/gridmet.html</a> )<br>Resolution: Daily                                                   |
| Flow Discharge                | Source: USGS, Station 0557200<br>( <a href="https://waterdata.usgs.gov/nwis">https://waterdata.usgs.gov/nwis</a> )<br>Resolution: Daily                                                           |
| Riverine Nitrate              | Source: Illinois State Water Survey<br>Resolution: Daily                                                                                                                                          |
| Crop Yield                    | Source: USDA NASS<br>Resolution: Annual                                                                                                                                                           |

**Table S2.** Final calibrated SWAT+ parameters for hydrology, nutrient dynamics, and crop yield.

| Parameters       | Description                                                                | Change Type         | Value   |
|------------------|----------------------------------------------------------------------------|---------------------|---------|
| <b>Hydrology</b> |                                                                            |                     |         |
| cn2              | Partitions precipitation to surface flow and subsurface infiltration       | pctchg <sup>1</sup> | 1.275   |
| cn3_swf          | Pothole evaporation coefficient                                            | pctchg              | -10.638 |
| esco             | Soil evaporation compensation factor                                       | absval              | 0.021   |
| epco             | Plant uptake compensation factor                                           | absval              | 0.313   |
| ovn              | Manning's "n" value for overland flow                                      | pctchg              | 2.150   |
| awc              | Available water capacity of the soil layer (mm H <sub>2</sub> O/mm soil)   | pctchg              | 4.954   |
| bd               | Moist bulk density (Mg/m <sup>3</sup> or g/cm <sup>3</sup> )               | pctchg              | -15.338 |
| z                | Depth from soil surface to bottom of layer (mm)                            | pctchg              | 31.720  |
| k                | Saturated hydraulic conductivity (mm/hr)                                   | pctchg              | 45.154  |
| latq_co          | Lateral flow coefficient                                                   | absval <sup>2</sup> | 0.815   |
| lat_ttime        | Lateral flow travel time (days)                                            | absval              | 5.456   |
| perco            | Percolation coefficient - adjusts soil moisture for percolation to occur   | absval              | 0.899   |
| biomix           | Biological mixing efficiency                                               | absval              | 0.897   |
| canmx            | Maximum canopy storage (mm H <sub>2</sub> O)                               | absval              | 0.110   |
| snofall_tmp      | Temperature at which precipitation converts to snow                        | absval              | 1.849   |
| snomelt_tmp      | Temperature required for snowmelt                                          | absval              | 2.172   |
| tile_latk        | Multiplication factor to determine lateral Ksat from SWAT Ksat input value | absval              | 3.143   |

|                                          |                                                                                                       |        |                            |
|------------------------------------------|-------------------------------------------------------------------------------------------------------|--------|----------------------------|
| tile_lag                                 | Drain tile lag time                                                                                   | absval | 20.369                     |
| alpha                                    | Baseflow alpha factor (1/days)                                                                        | absval | 0.737                      |
| revap_min                                | Threshold depth of water in the shallow aquifer for revap or percolation to the deep aquifer to occur | absval | 42.384                     |
| surlag                                   | Surface runoff lag coefficient                                                                        | absval | 7.205                      |
| <b>NO<sub>3</sub>-N &amp; Crop Yield</b> |                                                                                                       |        |                            |
| cmn                                      | Rate factor for humus mineralization of active organic nutrients (N and P)                            | absval | 0.0026                     |
| cdn                                      | Denitrification exponential rate coefficient                                                          | absval | 0.965                      |
| sdnco                                    | Denitrification threshold water content                                                               | absval | 0.781                      |
| nperco                                   | Nitrate percolation coefficient                                                                       | absval | 0.996                      |
| n_updis*                                 | Nitrogen uptake distribution parameter                                                                | absval | 48.398                     |
| harv_idx*                                | Potential harvest index for the plant at maturity under ideal growing condition                       | absval | 0.50 (corn),<br>0.32 (soy) |
| lai_pot*                                 | Maximum potential leaf area index                                                                     | absval | 5.5 (corn),<br>5.0 (soy)   |

<sup>1</sup> pctchg = percentage change; <sup>2</sup> absval = absolute value.

**Table S3.** Model simulated hydrologic components for calibration period 1994-2000 and validation period 2001-2007.

| Components          | Calibration (1994-2000) | Validation (2001-2007) |
|---------------------|-------------------------|------------------------|
| Precipitation (mm)  | 1007.72                 | 1046.09                |
| Snowfall (mm)       | 98.72                   | 91.94                  |
| Actual ET (mm)      | 654.57                  | 674.77                 |
| Water Yield (mm)    | 190.60                  | 211.82                 |
| Surface Runoff (mm) | 9.03                    | 12.86                  |
| Lateral Flow (mm)   | 1.06                    | 1.06                   |
| Tile Flow (mm)      | 180.51                  | 197.90                 |
